# Supplementary material for: Aqueous extracts of lingonberry and blackberry leaves identified by high-content screening beneficially act on cholesterol metabolism
Source: Royal Society of Chemistry journal article supplement (doi:10.1039/d1fo01169c), 2021-01-01
Supplement: d1fo01169c1.pdf [file d1fo01169c1.pdf]

Supplemental material to

**Aqueous extracts of lingonberry and blackberry leaves identified by high-content screening beneficially act on cholesterol metabolism.**

*Clemens Röhrl, Stefanie Steinbauer, Raimund Bauer, Eva Roitinger, Katharina Otteneder, Melanie Wallner, Cathrina Neuhauser, Bettina Schwarzingler, Clemens Schwarzingler, Herbert Stangl, Marcus Iken and Julian Weghuber*

**Table S1. Screening results for top-extracts.** Extracts giving positive results in both screening rounds are displayed. SRE-activity is given as mean from both screening rounds. For methodological details, see main manuscript.

| rank | systematic name           | common name                                       | SRE-activity |
|------|---------------------------|---------------------------------------------------|--------------|
| 1    | Vaccinium vitis-idaea     | lingonberry                                       | 3,16         |
| 2    | Poterium spinosum         | thorny burnet                                     | 2,73         |
| 3    | Anagallis arvensis        | scarlet pimpernel                                 | 2,55         |
| 4    | Chondrodendron tomentosum | pareira                                           | 2,51         |
| 5    | Peumus boldus             | boldo                                             | 2,42         |
| 6    | Agrimonia                 | agrimony                                          | 2,29         |
| 7    | Sarsaparillae             | sarsaparilla                                      | 2,15         |
| 8    | Myrtus communis           | myrtle                                            | 2,14         |
| 9    | Viburnum prunifolium      | blackhaw, blackhaw viburnum, sweet haw, stag bush | 2,03         |
| 10   | Cusparia febrifuga        | angostura                                         | 2,02         |
| 11   | Daucus carota             | carrot                                            | 2,00         |
| 12   | Rubus fruticosus          | blackberry                                        | 1,78         |
| 13   | Satureja hortensis        | summer savory                                     | 1,75         |
| 14   | Pyrus                     | pear                                              | 1,75         |
| 15   | Aronia × prunifolia       | purple chokeberry                                 | 1,69         |
| 16   | Tussilago farfara         | coltsfoot                                         | 1,67         |
| 17   | Allium sativum            | garlic                                            | 1,66         |
| 18   | Agrimonia                 | agrimony                                          | 1,66         |
| 19   | Echinacea purpureae       | purple coneflower                                 | 1,64         |
| 20   | Geranium robertianum      | herb-Robert                                       | 1,58         |
| 21   | Dipteryx odorata          | cumaru                                            | 1,53         |
| 22   | Passiflora caerulea       | passionflower                                     | 1,53         |
| 23   | Lycopodium clavatum       | common/stag's-horn/running clubmoss, ground pine  | 1,51         |
| 24   | Filipendula ulmaria       | meadowsweet, mead wort                            | 1,50         |
| 25   | --                        | flower pollen, Spanish                            | 1,48         |
| 26   | Artemisia absinthium      | wormwood                                          | 1,45         |
| 27   | Sambucus nigra            | elderberry                                        | 1,42         |
| 28   | Fagopyrum                 | buckwheat                                         | 1,35         |

**Table S2. LC-MS analysis of lingonberry leaf extract.** Compounds were assigned according a recently published analysis (Marsol-Vall et al. 2021; Food Chem, 2021, 339, 128052). This table shows the same results as table 1 in the main manuscript, but also includes compounds that could not be assigned as well as MS<sup>2</sup> fragments.

| compound name                                              | t <sub>R</sub> (UV)<br>[min] | exact mass<br>m/z [MH] <sup>+</sup> | fragment(s)        |
|------------------------------------------------------------|------------------------------|-------------------------------------|--------------------|
| unknown                                                    | 8,07                         | 577,1335                            | 425,0863; 289,0702 |
| unknown                                                    | 8,19                         | 325,0913                            | 307,2546; 163,0387 |
| unknown                                                    | 8,87                         | 611,1599                            | 465,1184; 303,0493 |
| quercetin-hexoside                                         | 9,01                         | 465,1015                            | 303,0490           |
| quercetin-hexoside                                         | 9,20                         | 465,1015                            | 303,0490           |
| quercetin-pentoside                                        | 9,57                         | 435,0918                            | 303,0493           |
| quercetin-pentoside                                        | 9,77                         | 435,0918                            | 303,0493           |
| quercetin-pentoside                                        | 9,96                         | 435,0918                            | 303,0493           |
| unknown                                                    | 10,22                        | 453,1175                            | 303,0493           |
| quercetin-3-O-rhamnoside                                   | 10,28                        | 449,1072                            | 303,0493           |
| unknown                                                    | 10,98                        | 367,0991                            | 163,0347           |
| quercetin-3-O-4''-(3-hydroxy-3-methylglutaroyl)-rhamnoside | 11,53                        | 593,1433                            | 303,0463           |
| kaempferol-3-hydroxy-3-methylglutaroyl-rhamnoside          | 12,25                        | 577,1262                            | 287,0514           |

**Table S3. LC-MS analysis of blackberry leaf extract.** Compounds were assigned according a previously published analysis (Pavlović et al. 2016; Industrial Crops and Products, 2016, 87, 304–314). This table shows the same results as table 1 in the main manuscript, but also includes compounds that could not be assigned as well as MS<sup>2</sup> fragments.

| Compound name                                       | t <sub>R</sub> (UV)<br>[min] | exact mass<br>m/z [M-H] <sup>-</sup> | exact mass<br>m/z [MH] <sup>+</sup> | fragment(s)<br>of [MH] <sup>+</sup> |
|-----------------------------------------------------|------------------------------|--------------------------------------|-------------------------------------|-------------------------------------|
| caffeoylquinic acid isomer                          | 3,31                         | 353,0886                             | 355,1025                            | 163,0026                            |
| caffeic acid hexoside isomer                        | 4,65                         | 341,0887                             | 343,1022                            | 325,0918                            |
| apigenin 7- <i>O</i> -hexuronide                    | 5,23                         | 445,0423                             | 447,0560                            | -*                                  |
| caffeoylquinic acid isomer                          | 5,76                         | 353,0886                             | 355,1024                            | 163,0389                            |
| unknown                                             | 6,20                         | 300,9993                             | 303,0135                            | -                                   |
| unknown                                             | 6,27                         | 291,0160                             | 293,0291                            | 275,0615                            |
| caffeoylquinic acid isomer                          | 6,50                         | 353,0889                             | 355,1024                            | -                                   |
| unknown                                             | 6,66                         | 301,0002                             | 303,0135                            | -                                   |
| apigenin 7- <i>O</i> -hexuronide                    | 7,15                         | 443,0272                             | 445,0403                            | -                                   |
| unknown                                             | 7,33                         | 300,9999                             | 303,0135                            | -                                   |
| unknown                                             | 7,59                         | 300,9999                             | 303,0135                            | -                                   |
| valoneic acid dilactone isomer                      | 7,82                         | 469,0059                             | 471,0195                            | -                                   |
| unknown, probably valoneic acid<br>dilactone isomer | 8,18                         | 469,0059                             | 471,0195                            | -                                   |
| unknown, probably valoneic acid<br>dilactone isomer | 8,30                         | 469,0058                             | 471,0196                            | -                                   |
| unknown, probably valoneic acid<br>dilactone isomer | 8,48                         | 469,0052                             | 471,0197                            | -                                   |
| ellagic acid                                        | 9,24                         | 300,9990                             | 303,0136                            | -                                   |
| quercetin-hexuronide                                | 9,64                         | 477,0669                             | 479,0819                            | 303,1645                            |
| kaempferol 7- <i>O</i> -hexuronide                  | 9,90                         | 461,0749                             | 463,0871                            | 287,1495                            |
| quercetin 3- <i>O</i> -pentoside                    | 10,24                        | 433,0792                             | 435,0923                            | -                                   |
| kaempferol 7- <i>O</i> -hexuronide                  | 10,58                        | 461,0725                             | 463,0869                            | -                                   |
| apigenin 7- <i>O</i> -hexuronide                    | 10,98                        | 445,0770                             | 447,0922                            | 271,1529                            |
| kaempferol hexoside isomer                          | 12,53                        | 593,1321                             | 595,1443                            | 287,1073                            |

\* ... mother ions were too small for automated MS<sup>2</sup> experiments

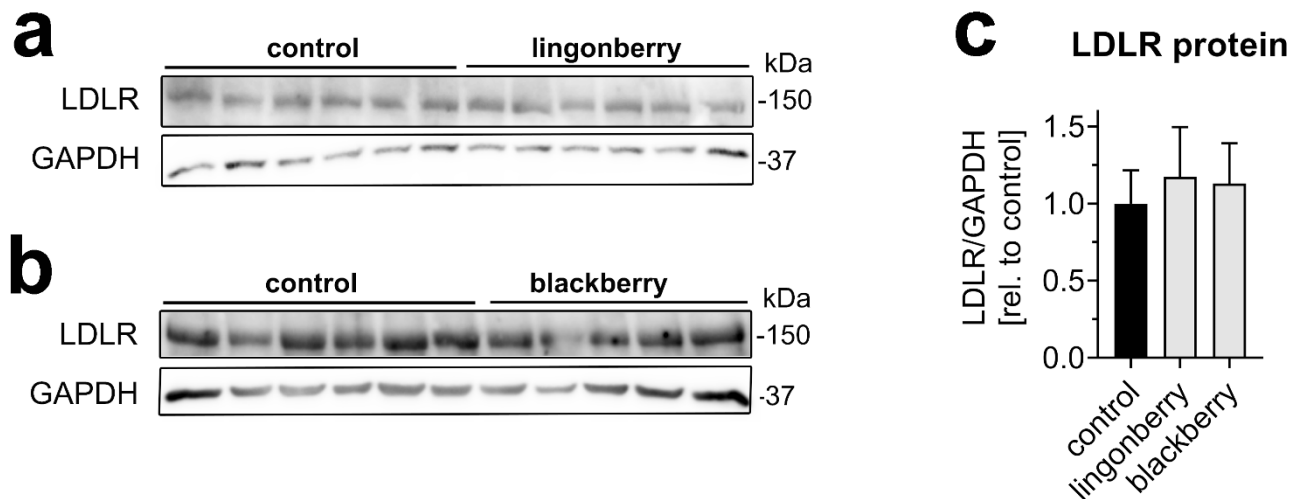

**Figure S1. Effect of lingonberry and blackberry leaf extracts on hepatic LDLR protein expression.** Plant extracts were applied to C57bl/6 mice for five consecutive days as described in the main manuscript. LDLR expression in liver tissue was detected by immunoblot (a, b). Semi-quantitative analysis by densitometry is depicted in panel c.

Figure legends for supplemental figures S2 and S3 (below):

**Figure S2. LC-MS analysis of lingonberry leaf extract.** Upper panel: Chromatogram with PDA detector. Lower panel: Chromatogram with APCI(pos)-MS detector in TIC mode. For methodological details, see main manuscript.

**Figure S3. LC-MS analysis of blackberry leaf extract.** Upper panel: Chromatogram with PDA detector. Lower panel: Chromatogram with APCI(pos)-MS detector in TIC mode. For methodological details, see main manuscript.

Figure S2

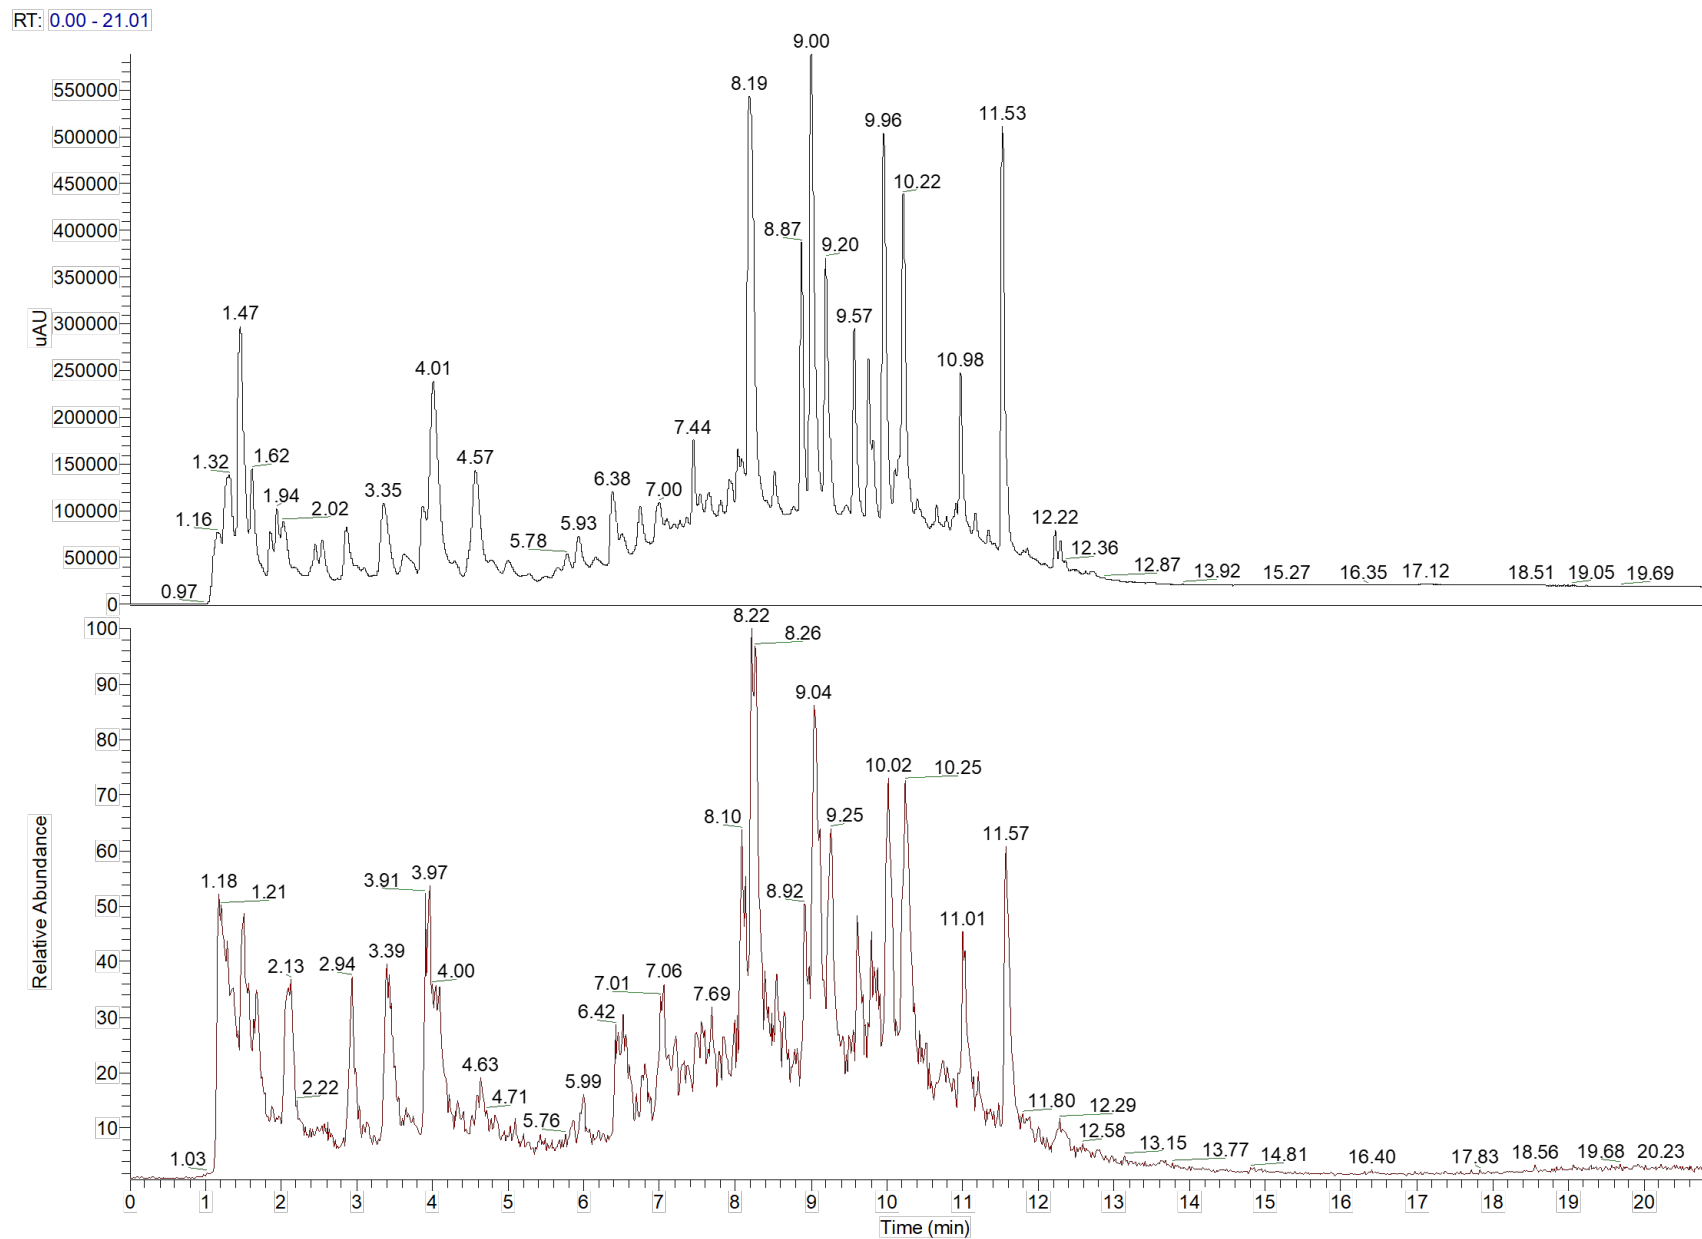

Figure S3

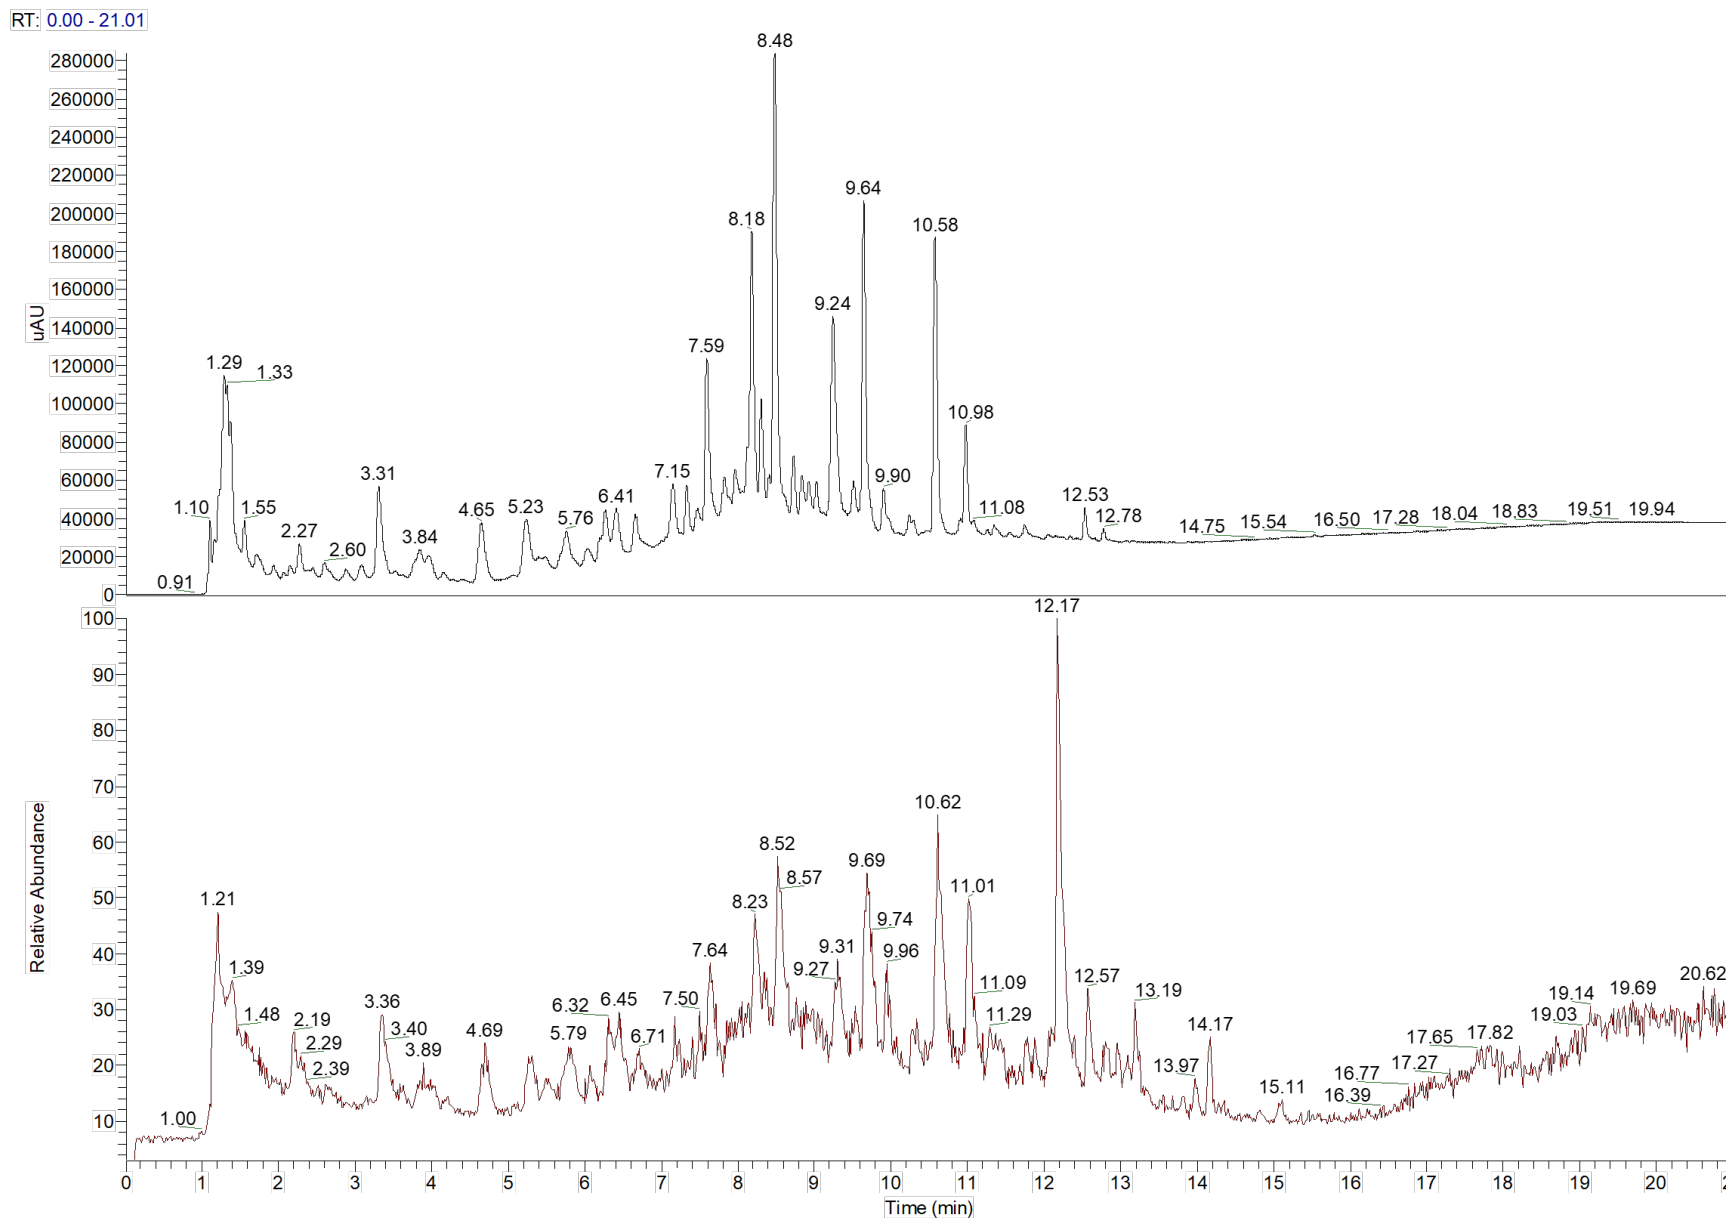



## LDLR mRNA expression

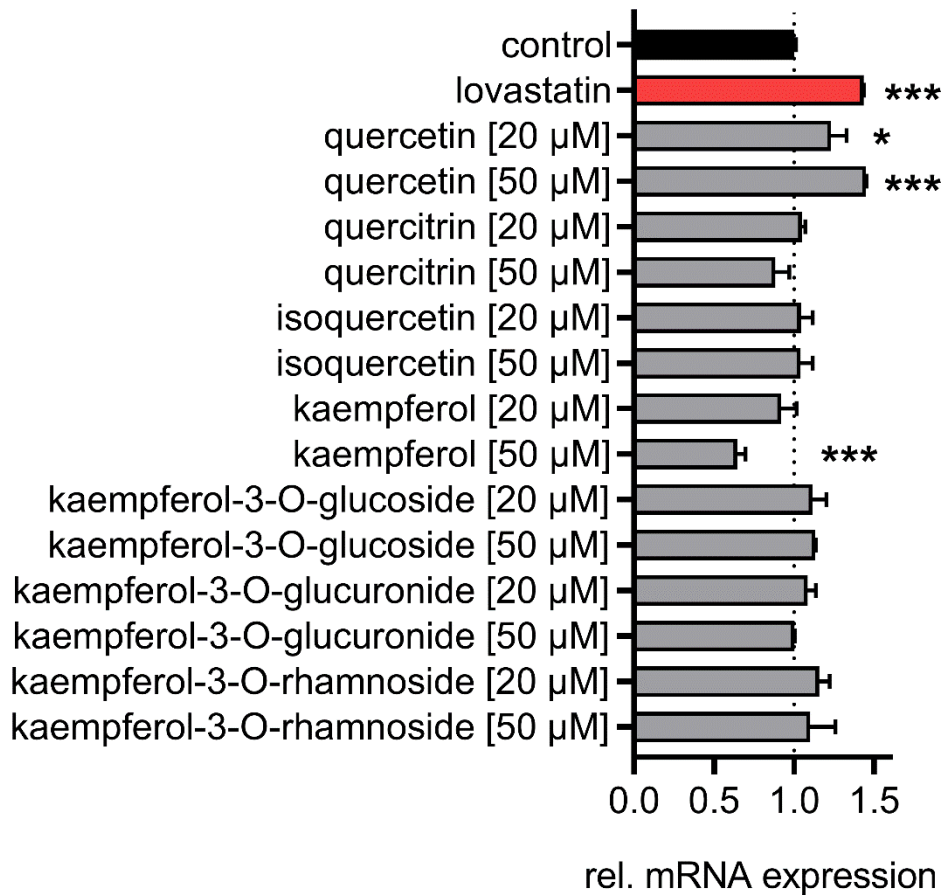

**Figure S4. Impact of quercetin, kaempferol, and its glycosides on LDLR expression.** Huh-7 cells were treated with the indicated compounds under serum-reduced conditions (1% FBS) for 24 hrs. Lovastatin [10 μM] was used as positive control. LDLR mRNA expression was measured by qRT-PCR and relative expression was normalized to two housekeeping genes ( $\beta$ -actin and GAPDH); n=2.
